# Supplementary material for: Systematic satellite observations of the impact of aerosols from passive volcanic degassing on local cloud properties
Source: Copernicus journal article supplement (doi:10.5194/acp-14-10601-2014), 2014-10-09
Supplement: Supplementary file 1 [file acp-14-10601-2014-supplement.pdf]

Supplement of Atmos. Chem. Phys., 14, 10601–10618, 2014  
<http://www.atmos-chem-phys.net/14/10601/2014/>  
doi:10.5194/acp-14-10601-2014-supplement  
© Author(s) 2014. CC Attribution 3.0 License.

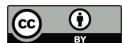

*Supplement of*

## **Systematic satellite observations of the impact of aerosols from passive volcanic degassing on local cloud properties**

**S. K. Ebmeier et al.**

*Correspondence to:* S. K. Ebmeier (sk.ebmeier@bristol.ac.uk)

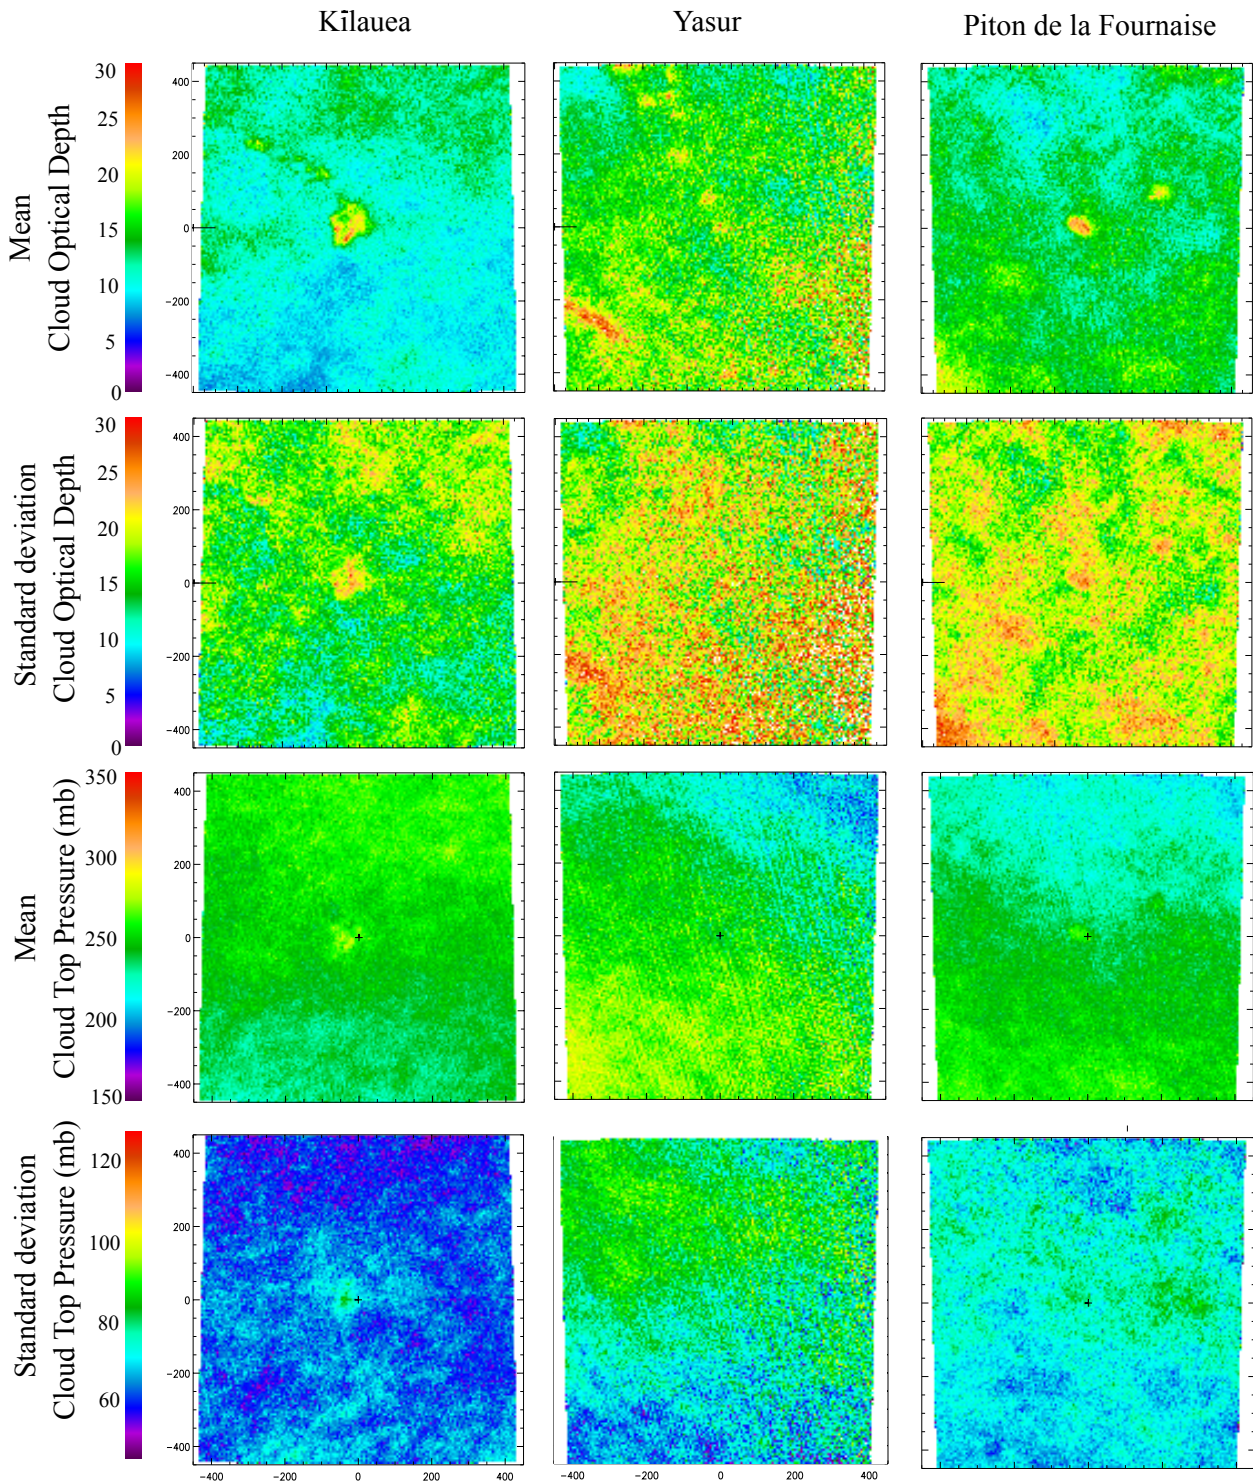

Multi-annual cloud property averages for MODIS  
 (Aqua, MYDATML2) retrievals 2002-2013)
